# Supplementary material for: Non-Thermal Atmospheric Pressure Plasma Efficiently Promotes the Proliferation of Adipose Tissue-Derived Stem Cells by Activating NO-Response Pathways
Source: PubMed Central journal article supplement (PMC5171835; doi:10.1038/srep39298), 2016-12-19

< Supplementary information >

**Non-Thermal Atmospheric Pressure Plasma Efficiently Promotes the Proliferation of Adipose Tissue-Derived Stem Cells by Activating NO-Response Pathways**

**Jeongyeon Park<sup>1</sup>, Hyunyoung Lee<sup>2</sup>, Hae June Lee<sup>2</sup>, Gyoo Cheon Kim<sup>3</sup>, Do Young Kim<sup>4</sup>,  
Sungbum Han<sup>5</sup>, and Kiwon Song<sup>1,\*\*</sup>**

<sup>1</sup>Department of Biochemistry, College of Life Science and Biotechnology, Yonsei University, Seoul 03722, Korea

<sup>2</sup>Department of Electrical Engineering, Pusan National University, Pusan 46241, Korea

<sup>3</sup>Department of Oral Anatomy, School of Dentistry, Pusan National University, Yangsan 50612, Korea

<sup>4</sup>Department of Dermatology and Cutaneous Biology Research Institute, Yonsei University College of Medicine, Seoul 03722, Korea

<sup>5</sup>JW Plastic Surgery Center, Seoul 06025, Korea

**\*\*All correspondence should be addressed to Kiwon Song**

Department of Biochemistry, College of Life Science and Biotechnology, Yonsei University, Seoul 03722, Korea

Tel: 82-2-2123-2705; Fax: 82-2-362-9897; E-mail: [bc5012@yonsei.ac.kr](mailto:bc5012@yonsei.ac.kr)

## **Legends to figures**

**Supplementary Figure S1. Non-thermal atmospheric pressure plasma (NTAPP) induces the activation of caspase-3 in HeLa cells but not in adipose tissue-derived stem cells (ASCs).** (A, B) In NTAPP-exposed ASCs (A) and HeLa cells (B), the expression of caspase-3 and cleaved caspase-3 was analyzed by western blots. Actin was used as a loading control. Cells treated to UV were used as a positive control for cell death.

**Supplementary Figure S2. Non-thermal atmospheric pressure plasma (NTAPP)-exposed adipose tissue-derived stem cells (ASCs) maintain their stemness characteristics.** (A) Flow cytometry was performed to analyze the expression of surface markers, CD44, CD105, and CD45, in the NTAPP-exposed ASCs at 72 h after the initial exposure and in NTAPP-untreated control ASCs. (B) The NTAPP-exposed and -unexposed ASCs were induced to differentiate into adipocytes in adipogenic differentiation medium for 28 days, and the number of adipocytes was counted after Oil red O staining. The relative percentage of differentiated adipocytes was plotted with standard deviations.

**Supplementary Figure S1**

**A**

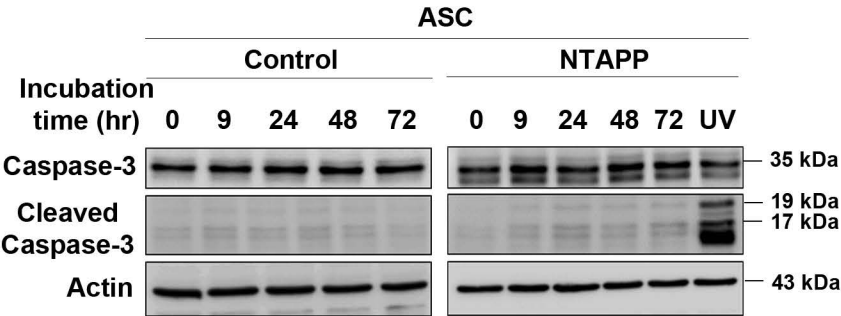

**B**

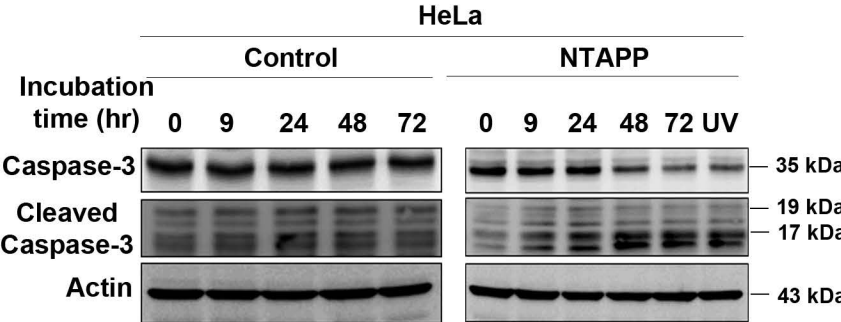

# Supplementary Figure S2

**A**

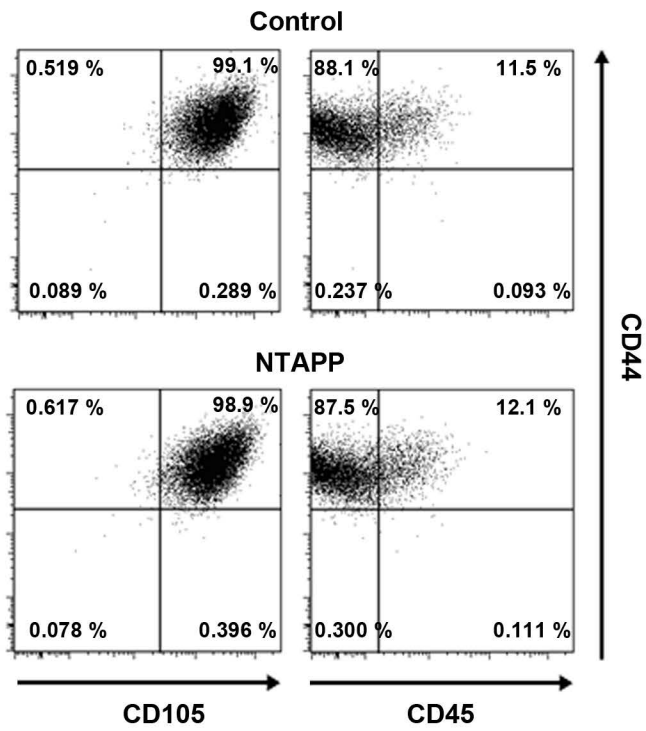

**B**

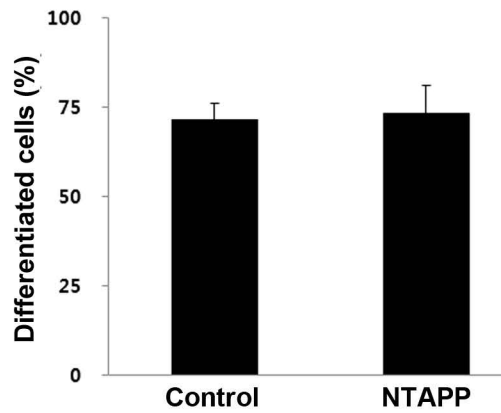

Supplement: srep39298-s1.pdf [file srep39298-s1.pdf]
